# Supplementary material for: Analysis of regulatory network topology reveals functionally distinct classes of microRNAs
Source: PubMed Central journal article supplement — Nucleic Acids Res. 2008 Oct 15;36(20):6494–503. doi: 10.1093/nar/gkn712 (PMC2582613; doi:10.1093/nar/gkn712), 2008-10-15

**Table S1.** Statistics of integrated regulatory networks (IRNs).

**A.** Type of nodes.

| Node Type | Protein | TF   | miRNA |
|-----------|---------|------|-------|
| Number    | 24174   | 2278 | 408   |

**B.** TF regulation of genes inferred from PReMod.

| TFs | Edges to miRNA | Edges to TF | Edges to non-TF protein | Toatal edges |
|-----|----------------|-------------|-------------------------|--------------|
| 405 | 2190           | 17548       | 76633                   | 96371        |

**C.** MiRNA regulations of protein genes inferred from miRanda and PicTar.

|         | miRNAs | Edges to protein | Edges to TF |
|---------|--------|------------------|-------------|
| miRanda | 157    | 39801            | 7785        |
| PicTar  | 178    | 75968            | 13442       |
| Overlap | 129    | 8629             | 1876        |

**Table S2.** Frequencies of network subgraphs in integrated regulatory networks compared with expected results from random simulations: A. T2m1; B. T1m2; C. T1m1g1. Elements of subgraph: square, TF; triangle, miRNA; ellipse, protein. Besides observed and expected frequencies and Z-score, we also listed P-value (fraction of simulation runs where concerned subgraph appears in the observed frequency or more). We executed 500 runs for T2m1 and T1m2, and 200 runs for T1m1g1), and number of clusters consisted of concerned subgraph members. Subgraphs sharing one or more nodes/edges are classified into the same cluster, and repeat this classification until cluster number reaches minimum. Threshold for significant motifs: Z-score  $\geq 3.41$  (A), 2.94 (B) and 3.01 (C) and number of clusters  $\geq 5$ . Different Z-score cutoff values are chosen so that their corrected probabilities of multiple (group size) testing are 0.01. Significant motifs are sorted according to their ratios. Consistent significant motifs are marked with star. Because of space limit and simplicity, only results from PReMode-based networks were listed in A, B and C. The consistent motifs from all 4 data sets were presented in D.

**A. T2m1**

| miRanda                                                                               |          |               |       |         |          | PicTar                                                                                |          |               |        |         |          |
|---------------------------------------------------------------------------------------|----------|---------------|-------|---------|----------|---------------------------------------------------------------------------------------|----------|---------------|--------|---------|----------|
| Subgraph                                                                              | Observed | Expected      | Ratio | Z-Score | Clusters | Subgraph                                                                              | Observed | Expected      | Ratio  | Z-Score | Clusters |
| * 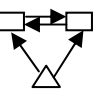   | 350      | 9.5±5.0       | 36.84 | 68.1    | 9        | *    | 216      | 21.1±8.0      | 10.24  | 24.4    | 9        |
|      | 55       | 21.7±7.5      | 2.53  | 4.5     | 6        |      | 59       | 24.0±9.1      | 2.46   | 3.9     | 9        |
| *   | 1166     | 855.9±55.1    | 1.36  | 5.6     | 49       | *   | 1872     | 1516.0±82.5   | 1.23   | 4.3     | 64       |
| *  | 10749    | 8602.8±258.8  | 1.25  | 8.3     | 76       | *  | 11253    | 9394.9±263.2  | 1.20   | 7.1     | 85       |
| *  | 12865    | 10475.2±214.3 | 1.23  | 11.2    | 80       | *  | 22624    | 19083.0±471.1 | 1.19   | 7.5     | 99       |
| *  | 13936    | 11530.7±379.6 | 1.21  | 6.3     | 79       | *  | 11617    | 10157.8±307.6 | 1.14   | 4.7     | 96       |
| *  | 9772     | 8704.7±277.3  | 1.12  | 3.8     | 81       | *  | 31755    | 28182.7±481.2 | 1.13   | 7.4     | 115      |
| *  | 18242    | 16501.0±425.2 | 1.11  | 4.1     | 113      | *  | 34008    | 30327.6±316.7 | 1.12   | 11.6    | 131      |
| *  | 19119    | 17374.8±230.3 | 1.10  | 7.6     | 108      | *  | 25900    | 23869.9±537.4 | 1.09   | 3.8     | 132      |
|    | 30       | 12.7±6.3      | 2.36  | 2.8     | 4        |    | 6        | 0.05±0.2      | 120.00 | 27.3    | 2        |
|    | 352      | 291.5±23.9    | 1.21  | 2.5     | 36       |    | 1814     | 1600.0±68.6   | 1.13   | 3.1     | 66       |
|    | 1205     | 1093.1±60.4   | 1.10  | 1.9     | 41       |    | 47       | 23.0±8.3      | 2.04   | 2.9     | 6        |

|  |       |               |      |      |    |  |       |               |      |      |     |
|--|-------|---------------|------|------|----|--|-------|---------------|------|------|-----|
|  | 26436 | 24780.5±895.5 | 1.07 | 1.8  | 82 |  | 1126  | 839.3±120.5   | 1.34 | 2.4  | 20  |
|  | 667   | 607.7±39.7    | 1.10 | 1.5  | 37 |  | 951   | 680.7±123.1   | 1.40 | 2.2  | 19  |
|  | 16    | 13.2±4.5      | 1.21 | 0.6  | 3  |  | 482   | 426.0±29.9    | 1.13 | 1.9  | 48  |
|  | 24    | 21.4±6.2      | 1.12 | 0.4  | 5  |  | 1238  | 1046.9±142.6  | 1.18 | 1.3  | 20  |
|  | 2     | 1.6±1.5       | 1.25 | 0.3  | 1  |  | 29721 | 28521.5±972.4 | 1.04 | 1.2  | 100 |
|  | 46    | 44.2±11.3     | 1.04 | 0.2  | 6  |  | 612   | 513.4±85.1    | 1.19 | 1.2  | 19  |
|  | 342   | 335.9±72.3    | 1.02 | 0.1  | 10 |  | 1258  | 1189.8±64.0   | 1.06 | 1.1  | 45  |
|  | 0     | 0.04±0.19     | 0.00 | -0.2 | 0  |  | 77    | 63.6±12.6     | 1.21 | 1.1  | 12  |
|  | 0     | 0.8±0.9       | 0.00 | -0.8 | 0  |  | 63    | 49.4±13.2     | 1.28 | 1.0  | 13  |
|  | 0     | 1.3±1.3       | 0.00 | -1.0 | 0  |  | 86    | 78.5±18.6     | 1.10 | 0.4  | 13  |
|  | 347   | 453.6±78.7    | 0.76 | -1.4 | 11 |  | 30    | 27.9±7.2      | 1.08 | 0.3  | 10  |
|  | 14    | 25.8±7.1      | 0.54 | -1.7 | 4  |  | 2     | 2.1±1.6       | 0.95 | 0.0  | 1   |
|  | 419   | 604.0±110.3   | 0.69 | -1.7 | 11 |  | 3     | 3.4±2.3       | 0.88 | -0.2 | 2   |
|  | 313   | 445.3±72.9    | 0.70 | -1.8 | 15 |  | 1063  | 1129.0±221.2  | 0.94 | -0.3 | 18  |
|  | 3     | 14.9±6.5      | 0.20 | -1.8 | 2  |  | 20    | 26.4±8.0      | 0.76 | -0.8 | 5   |
|  | 308   | 532.8±104.1   | 0.58 | -2.2 | 9  |  | 0     | 1.4±1.2       | 0.00 | -1.1 | 0   |
|  | 3     | 17.8±6.3      | 0.17 | -2.3 | 2  |  | 11    | 21.4±7.4      | 0.51 | -1.4 | 7   |
|  | 234   | 466.4±90.5    | 0.50 | -2.6 | 12 |  | 373   | 518.9±83.1    | 0.72 | -1.8 | 16  |

B. T1m2

| miRanda                                                                           |          |               |       |         |          | PicTar                                                                            |          |               |       |         |          |
|-----------------------------------------------------------------------------------|----------|---------------|-------|---------|----------|-----------------------------------------------------------------------------------|----------|---------------|-------|---------|----------|
| Subgraph                                                                          | Observed | Expected      | Ratio | Z-Score | Clusters | Subgraph                                                                          | Observed | Expected      | Ratio | Z-Score | Clusters |
|  | 5564     | 4247.7±238.0  | 1.31  | 5.5     | 56       |  | 29127    | 24032.6±334.4 | 1.21  | 15.2    | 80       |
|  | 16136    | 13257.5±244.2 | 1.22  | 11.8    | 70       |  | 8906     | 7606.6±294.5  | 1.17  | 4.4     | 68       |
|  | 682      | 520.6±102.3   | 1.31  | 1.6     | 12       |  | 1153     | 820.1±121.5   | 1.41  | 2.7     | 21       |
|  | 3808     | 3551.0±214.1  | 1.07  | 1.2     | 40       |  | 4861     | 4907.4±298.9  | 0.99  | -0.2    | 52       |
|  | 9        | 9.0±5.3       | 1.00  | 0.0     | 3        |  | 20       | 17.0±6.9      | 1.18  | 0.4     | 6        |
|  | 68       | 144.8±29.1    | 0.47  | -2.6    | 9        |  | 333      | 382.1±79.1    | 0.87  | -0.6    | 19       |

C. TImigl

| miRanda                                                                            |          |                  |       |         |          | PicTar                                                                              |          |                   |       |         |          |
|------------------------------------------------------------------------------------|----------|------------------|-------|---------|----------|-------------------------------------------------------------------------------------|----------|-------------------|-------|---------|----------|
| Subgraph                                                                           | Observed | Expected         | Ratio | Z-Score | Clusters | Subgraph                                                                            | Observed | Expected          | Ratio | Z-Score | Clusters |
| 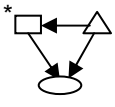   | 11839    | 9068.4±179.1     | 1.31  | 15.5    | 121      |    | 27528    | 22685.1±396.2     | 1.21  | 12.2    | 155      |
|    | 318900   | 271895.0±3633.5  | 1.17  | 12.9    | 86       |    | 601439   | 522115.0±6411.6   | 1.15  | 12.4    | 106      |
|    | 15388    | 13187.3±422.3    | 1.17  | 5.2     | 84       |    | 25675    | 22448.3±690.2     | 1.14  | 4.7     | 101      |
|    | 548496   | 477667.0±4043.9  | 1.15  | 17.5    | 131      |    | 484968   | 428255.0±1130.4   | 1.13  | 50.2    | 178      |
|    | 290533   | 255762.0±913.1   | 1.14  | 38.1    | 157      |    | 618072   | 552856.0±8024.2   | 1.12  | 8.1     | 164      |
|    | 414894   | 376670.0±3209.0  | 1.10  | 11.9    | 131      |    | 1633680  | 1492560.0±11775.5 | 1.09  | 12.0    | 164      |
|   | 631125   | 607252.0±17779.0 | 1.04  | 1.3     | 86       |   | 710340   | 702647.0±20759.5  | 1.01  | 0.4     | 106      |
|  | 274      | 332.7±67.5       | 0.82  | -0.9    | 12       |  | 1325     | 1223.8±266.9      | 1.08  | 0.4     | 22       |
|  | 8513     | 10758.4±1738.6   | 0.79  | -1.3    | 12       |  | 30882    | 29754.2±4285.1    | 1.04  | 0.3     | 22       |
|  | 7451     | 12350.3±2136.1   | 0.60  | -2.3    | 12       |  | 28311    | 29418.2±6416.7    | 0.96  | -0.2    | 22       |

D. Common significant network motifs from 4 data sets.

| Category | Motifs                                                                              | PReMod:miRanda |         | PReMod:PicTar |         | cTFBS:miRanda |         | cTFBS:PicTar |         |
|----------|-------------------------------------------------------------------------------------|----------------|---------|---------------|---------|---------------|---------|--------------|---------|
|          |                                                                                     | Ratio          | Z-Score | Ratio         | Z-Score | Ratio         | Z-Score | Ratio        | Z-Score |
| T2m1     | 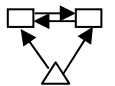   | 36.70          | 68.1    | 10.25         | 24.4    | 13.60         | 20.9    | 12.06        | 31.1    |
|          |    | 1.25           | 8.3     | 1.20          | 7.1     | 1.23          | 6.7     | 1.17         | 5.1     |
|          |    | 1.23           | 11.2    | 1.13          | 7.4     | 1.28          | 9.9     | 1.15         | 6.3     |
|          |    | 1.10           | 7.6     | 1.12          | 11.6    | 1.09          | 5.4     | 1.07         | 5.4     |
| T1m2     |    | 1.22           | 11.8    | 1.21          | 15.2    | 1.23          | 8.8     | 1.19         | 9.7     |
| T1mig1   |    | 1.31           | 15.5    | 1.21          | 12.2    | 1.28          | 13.2    | 1.22         | 14.3    |
|          |    | 1.17           | 12.9    | 1.15          | 12.4    | 1.14          | 11.8    | 1.11         | 9.1     |
|          |  | 1.17           | 5.2     | 1.14          | 4.7     | 1.12          | 4.8     | 1.09         | 4.1     |
|          |  | 1.15           | 17.5    | 1.09          | 12.0    | 1.17          | 13.4    | 1.10         | 9.0     |
|          |  | 1.14           | 38.1    | 1.13          | 50.2    | 1.12          | 42.2    | 1.12         | 52.7    |
|          |  | 1.10           | 11.9    | 1.12          | 8.1     | 1.13          | 10.3    | 1.10         | 10.7    |
|          |  |                |         |               |         |               |         |              |         |

**Table S3.** Effects of false regulatory relations on detection of the most significant network motif (the miRNA-regulated TF feedback loop), studied by partially shuffling two IRNs based on PreMod. We repeated 100 times for each fraction of randomization, and presented average values in the table.

| Shuffle Fraction |                  | 0    | 0.1   | 0.2   | 0.3   | 0.4  | 0.5  | 0.6  | 0.7  | 0.8  |
|------------------|------------------|------|-------|-------|-------|------|------|------|------|------|
| miRanda          | Observed         | 350  | 233.6 | 160.4 | 109.2 | 76.1 | 53.6 | 38.4 | 29.2 | 21.1 |
|                  | Expected         | 9.5  | 9.5   | 9.5   | 9.5   | 9.5  | 9.5  | 9.5  | 9.5  | 9.5  |
|                  | SD               | 5.0  | 5.0   | 5.0   | 5.0   | 5.0  | 5.0  | 5.0  | 5.0  | 5.0  |
|                  | Enrichment Ratio | 36.7 | 24.5  | 16.8  | 11.4  | 8.0  | 5.6  | 4.0  | 3.1  | 2.2  |
|                  | Z-Score          | 68.1 | 44.8  | 30.2  | 19.9  | 13.3 | 8.8  | 5.8  | 3.9  | 2.3  |
| PicTar           | Obs.             | 216  | 151.9 | 109.7 | 74.5  | 57.9 | 49.3 | 38.6 | 33.3 | 28.7 |
|                  | Expected         | 21.1 | 21.1  | 21.1  | 21.1  | 21.1 | 21.1 | 21.1 | 21.1 | 21.1 |
|                  | SD               | 8.0  | 8.0   | 8.0   | 8.0   | 8.0  | 8.0  | 8.0  | 8.0  | 8.0  |
|                  | Enrichment Ratio | 10.2 | 7.2   | 5.2   | 3.5   | 2.7  | 2.3  | 1.8  | 1.6  | 1.4  |
|                  | Z-Score          | 24.4 | 16.4  | 11.1  | 6.7   | 4.6  | 3.5  | 2.2  | 1.5  | 1.0  |

**Table S4.** Detection of the most significant network motif (the miRNA-regulated TF feedback loop), using cTFBS set from the "TFBS Conserved" track of UCSC genome browser (see Methods). This set of TFBSs have conservation Z-scores, and we chose 4 values as cutoff to get 4 sets of TF regulations.

| TFBS conservation threshold: Z-score (P-Value) |                  | 1.64 (0.051) | 2.00 (0.023) | 2.33 (0.01) | 2.58 (0.005) |
|------------------------------------------------|------------------|--------------|--------------|-------------|--------------|
| miRanda                                        | Observed         | 264          | 125          | 109         | 107          |
|                                                | Expected (SD)    | 94.2 (16.5)  | 31.5 (9.6)   | 8.0 (4.8)   | 2.7 (2.9)    |
|                                                | Enrichment Ratio | 2.8          | 4.0          | 13.6        | 39.6         |
|                                                | Z-Score          | 10.3         | 9.8          | 20.9        | 36.1         |
| PicTar                                         | Observed         | 895          | 446          | 301         | 273          |
|                                                | Expected (SD)    | 275.4 (28.2) | 95.8 (18.0)  | 25.0 (8.9)  | 8.0 (5.1)    |
|                                                | Enrichment Ratio | 3.3          | 4.7          | 12.1        | 34.0         |
|                                                | Z-Score          | 22.0         | 19.4         | 31.1        | 51.6         |



**Table S5.** Two classes of miRNAs

| Class I       | Class II     |                |
|---------------|--------------|----------------|
| hsa-mir-10b   | hsa-let-7g   | hsa-mir-136    |
| hsa-mir-16    | hsa-mir-28   | hsa-mir-142-3p |
| hsa-mir-22    | hsa-mir-200a | hsa-mir-152    |
| hsa-mir-199b  | hsa-mir-103  | hsa-mir-15a    |
| hsa-mir-204   | hsa-mir-122a | hsa-mir-15b    |
| hsa-mir-132   | hsa-mir-208  | hsa-mir-211    |
| hsa-mir-212   | hsa-mir-31   | hsa-mir-185    |
| hsa-mir-191   | hsa-mir-223  | hsa-mir-34a    |
| hsa-mir-107   | hsa-mir-145  | hsa-mir-27b    |
| hsa-mir-10a   | hsa-mir-198  | hsa-mir-33     |
| hsa-mir-218   | hsa-mir-126* | hsa-mir-130b   |
| hsa-mir-187   | hsa-mir-134  | hsa-mir-320    |
| hsa-mir-129   | hsa-mir-150  | hsa-mir-142-5p |
| hsa-mir-125b  | hsa-mir-153  | hsa-mir-182    |
| hsa-mir-219   | hsa-mir-29b  | hsa-mir-203    |
| hsa-mir-214   | hsa-mir-29c  | hsa-mir-106b   |
| hsa-mir-199a  | hsa-mir-29a  | hsa-mir-93     |
| hsa-mir-9*    | hsa-mir-217  | hsa-mir-101    |
| hsa-mir-137   | hsa-mir-143  | hsa-mir-139    |
| hsa-mir-100   | hsa-mir-182* | hsa-mir-138    |
| hsa-mir-213   | hsa-mir-190  | hsa-mir-181c   |
| hsa-mir-199a* | hsa-mir-99a  | hsa-mir-23b    |
| hsa-mir-124a  | hsa-mir-149  | hsa-mir-30b    |
| hsa-mir-92    | hsa-let-7b   | hsa-mir-30d    |
| hsa-mir-9     | hsa-let-7c   | hsa-mir-32     |
| hsa-mir-195   | hsa-mir-98   | hsa-mir-206    |
|               | hsa-mir-25   | hsa-mir-221    |
|               | hsa-mir-186  | hsa-mir-26a    |
|               |              | hsa-mir-194    |

**Table S6.** Expression ranks of two classes of miRNAs in different development stages. Benjamini and Hochberg False Discovery Rate multiple testing correction was applied. Class I miRNAs prefer to express in embryo stage; while class II miRNAs in the adult stage. There are 5 violations among 54 cases (p-Value 1.9E-10).

| Name            | Class I | Class II | Rand Diff. | Orig. p-Value | Multiple Testing |
|-----------------|---------|----------|------------|---------------|------------------|
|                 |         |          |            |               | Corrected        |
| Uterus          | 43.08   | 42.68    | 0.40       | 0.47          | 0.48             |
| Cervix          | 42.16   | 42.74    | -0.58      | 0.47          | 0.48             |
| E7              | 48.52   | 47.76    | 0.76       | 0.45          | 0.48             |
| E15             | 47.16   | 48.08    | -0.92      | 0.42          | 0.46             |
| Bladder         | 45.13   | 43.42    | 1.71       | 0.40          | 0.45             |
| Adrenal Gland   | 41.83   | 39.23    | 2.60       | 0.35          | 0.39             |
| E17             | 50.64   | 47.69    | 2.95       | 0.33          | 0.38             |
| Testicle        | 43.56   | 46.57    | -3.01      | 0.32          | 0.38             |
| Breast          | 46.68   | 43.30    | 3.38       | 0.31          | 0.37             |
| Frontal Cortex  | 45.00   | 41.57    | 3.43       | 0.31          | 0.37             |
| Ovary           | 45.80   | 42.06    | 3.74       | 0.30          | 0.38             |
| brain           | 49.20   | 45.18    | 4.02       | 0.28          | 0.36             |
| Thymus          | 48.46   | 43.38    | 5.08       | 0.24          | 0.32             |
| Prostate        | 46.42   | 41.06    | 5.36       | 0.22          | 0.30             |
| Spleen          | 47.52   | 41.89    | 5.63       | 0.21          | 0.29             |
| Lung            | 48.96   | 43.36    | 5.60       | 0.21          | 0.29             |
| Brain           | 45.16   | 39.68    | 5.48       | 0.19          | 0.28             |
| 0 hrs           | 55.27   | 62.86    | -7.59      | 0.19          | 0.29             |
| Skeletal Muscle | 41.79   | 35.89    | 5.90       | 0.19          | 0.29             |
| 8 hrs           | 56.65   | 64.88    | -8.22      | 0.18          | 0.29             |
| Heart           | 40.44   | 34.19    | 6.25       | 0.18          | 0.29             |
| Small Intestine | 46.52   | 40.47    | 6.05       | 0.18          | 0.30             |
| Kidney          | 48.79   | 42.09    | 6.70       | 0.17          | 0.30             |
| Liver           | 41.54   | 34.81    | 6.73       | 0.16          | 0.29             |
| Lymph           | 46.32   | 39.11    | 7.21       | 0.15          | 0.29             |
| E11             | 42.64   | 49.45    | -6.81      | 0.14          | 0.26             |
| Placenta        | 48.72   | 39.13    | 9.59       | 0.07          | 0.14             |
| Fallopian       | 53.48   | 42.58    | 10.90      | 0.05          | 0.11             |
| Bone Marrow     | 50.16   | 39.36    | 10.80      | 0.05          | 0.11             |
| ovary           | 54.52   | 42.39    | 12.13      | 0.04          | 0.09             |
| Colon           | 51.76   | 39.23    | 12.53      | 0.04          | 0.09             |
| E11.5           | 36.65   | 49.38    | -12.73     | 0.04          | 0.09             |
| 12 hrs          | 53.42   | 69.46    | -16.03     | 0.04          | 0.09             |
| Hela S3         | 51.43   | 38.92    | 12.51      | 0.03          | 0.09             |
| kidney          | 55.20   | 41.61    | 13.59      | 0.02          | 0.06             |
| 16 hrs          | 51.00   | 68.19    | -17.19     | 0.02          | 0.07             |
| heart           | 54.96   | 42.31    | 12.65      | 0.02          | 0.07             |
| 4 hrs           | 47.04   | 65.18    | -18.14     | 0.02          | 0.05             |
| Pancreas        | 54.88   | 39.55    | 15.33      | 0.01          | 0.04             |
| thymus          | 58.32   | 43.80    | 14.52      | 0.01          | 0.04             |
| E9.5            | 36.20   | 53.10    | -16.90     | 0.01          | 0.04             |
| lung            | 57.12   | 42.06    | 15.06      | 0.01          | 0.02             |
| E10.5           | 33.15   | 52.56    | -19.41     | 0.01          | 0.02             |

|        |       |       |        |      |      |
|--------|-------|-------|--------|------|------|
| 20 hrs | 46.31 | 68.91 | -22.60 | 0.00 | 0.02 |
| 64 hrs | 45.00 | 66.84 | -21.84 | 0.00 | 0.02 |
| 28 hrs | 45.73 | 68.61 | -22.88 | 0.00 | 0.02 |
| 56 hrs | 44.88 | 67.32 | -22.43 | 0.00 | 0.02 |
| liver  | 57.12 | 38.88 | 18.24  | 0.00 | 0.01 |
| 24hrs  | 47.77 | 69.23 | -21.46 | 0.00 | 0.01 |
| 32 hrs | 43.81 | 68.02 | -24.21 | 0.00 | 0.01 |
| 96 hrs | 40.54 | 66.65 | -26.11 | 0.00 | 0.02 |
| 40 hrs | 41.85 | 68.67 | -26.82 | 0.00 | 0.00 |
| 48 hrs | 40.69 | 69.21 | -28.52 | 0.00 | 0.00 |

**Table S7.** Top 5 biased functions to each of two TF classes that regulate two miRNA classes respectively: GO items with positive Z-score prefer class I and negative for class II. All GO items associated with transcription factor are excluded. We found 943 GO items associated with class I TFs, and 225 GO items for class II TFs. Percentages of concerned GO among total GO items are denoted as  $p_I$  for class I and  $p_{II}$  for class II, and  $p$  is the expected percentage for both groups.

|          | GO item    | $p_I$  | $p_{II}$ | $p$    | Enrichment | $Z_I$ | Function             |
|----------|------------|--------|----------|--------|------------|-------|----------------------|
| Class I  | GO:0007165 | 0.0148 | 0        | 0.01   | 1.49       | 1.51  | signal transduction  |
|          | GO:0009887 | 0.0085 | 0        | 0.0057 | 1.49       | 1.14  | organogenesis        |
|          | GO:0007275 | 0.0233 | 0.0089   | 0.0186 | 1.25       | 1.08  | development          |
|          | GO:0007399 | 0.0064 | 0        | 0.0043 | 1.49       | 0.98  | neurogenesis         |
|          | GO:0006915 | 0.0042 | 0        | 0.0028 | 1.49       | 0.8   | apoptosis            |
| Class II | GO:0006955 | 0.0042 | 0.0178   | 0.0087 | 2.05       | -1.47 | immune response      |
|          | GO:0006629 | 0.0021 | 0.0089   | 0.0043 | 2.05       | -1.04 | lipid metabolism     |
|          | GO:0005524 | 0.0032 | 0.0089   | 0.0051 | 1.76       | -0.81 | ATP binding          |
|          | GO:0007420 | 0.0032 | 0.0089   | 0.0051 | 1.76       | -0.81 | brain development    |
|          | GO:0016021 | 0.0032 | 0.0089   | 0.0051 | 1.76       | -0.81 | integral to membrane |

**Figure S1.** Distribution of TF-miRNA co-regulation Z-scores. Z-score for any pair (assuming TF  $i$  and miRNA  $j$ ) is calculated as followed. For each gene, it has a probability  $p_{tfi} = T_{tfi} / N_{gn}$  to be regulated by TF  $i$ , where  $T_{tfi}$ : number of target protein genes by TF  $i$ , and  $N_{gn}$ : total protein genes. Similarly, the probability for this gene being regulated by miRNA  $j$  is  $p_{mij} = T_{mij} / N_{gn}$ , where  $T_{mij}$ : number of target protein genes by miRNA  $j$ . Expected number of genes co-regulated by TF  $i$  and miRNA  $j$  is  $N_{gn} p_{ij}$  (where  $p_{ij} = p_{tfi} p_{mij}$ ) and standard deviation is  $\sqrt{N_{gn} p_{ij} (1 - p_{ij})}$ . Thus, Z score is  $Z_{tfi:mij} = (T_{tfi:mij} - N_{gn} p_{ij}) / \sqrt{N_{gn} p_{ij} (1 - p_{ij})}$ , where  $T_{tfi:mij}$  is number of observed protein genes co-regulated by this TF-miRNA pair.

**Figure S2.** Network motif profile of miRNAs: **A.** PicTar data set; **B.** miRanda data set. A network subgraph is represented by a six-bit number. Six bits denote six states respectively: miRNA regulating TF 1, TF 1 regulating miRNA, TF 1 regulating TF 2, miRNA regulating TF2, TF 2 regulating miRNA and TF 2 regulating TF 1. Each state has two values: 1 (regulation exists) and 0 (regulation does not exist). For example, 100100 denotes the subgraph where two TFs regulated by a miRNA.

**Figure S3.** Expression difference between class I and II miRNAs in tumor (T) and normal (N) tissues: a bar is averaged rank of class I miRNAs subtracted by that of class II miRNAs. Positive sign indicates higher expression of class II miRNAs and negative for class I. Other abbreviations used: BLDR, bladder; BRST, breast; KID, kidney; Lvr, liver; MELA, melanoma; MESO, mesothelioma; PAN, pancreas; PROST, prostate; UT, uterus.

# TF-miRNA co-regulation

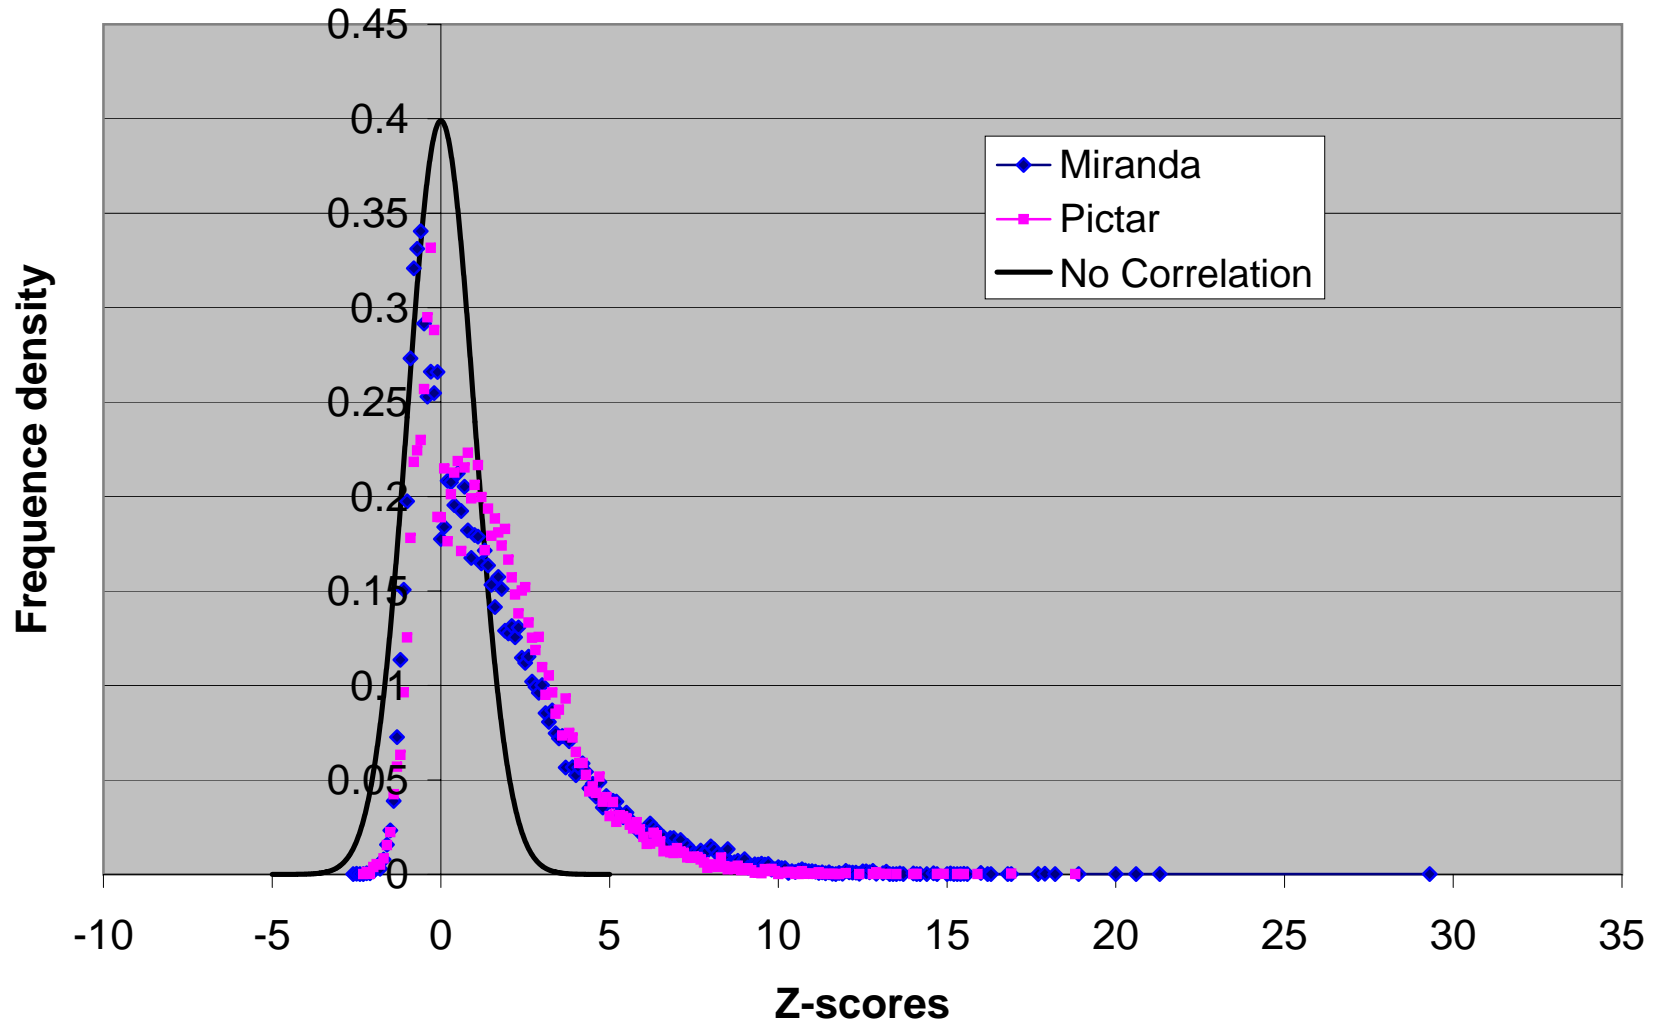

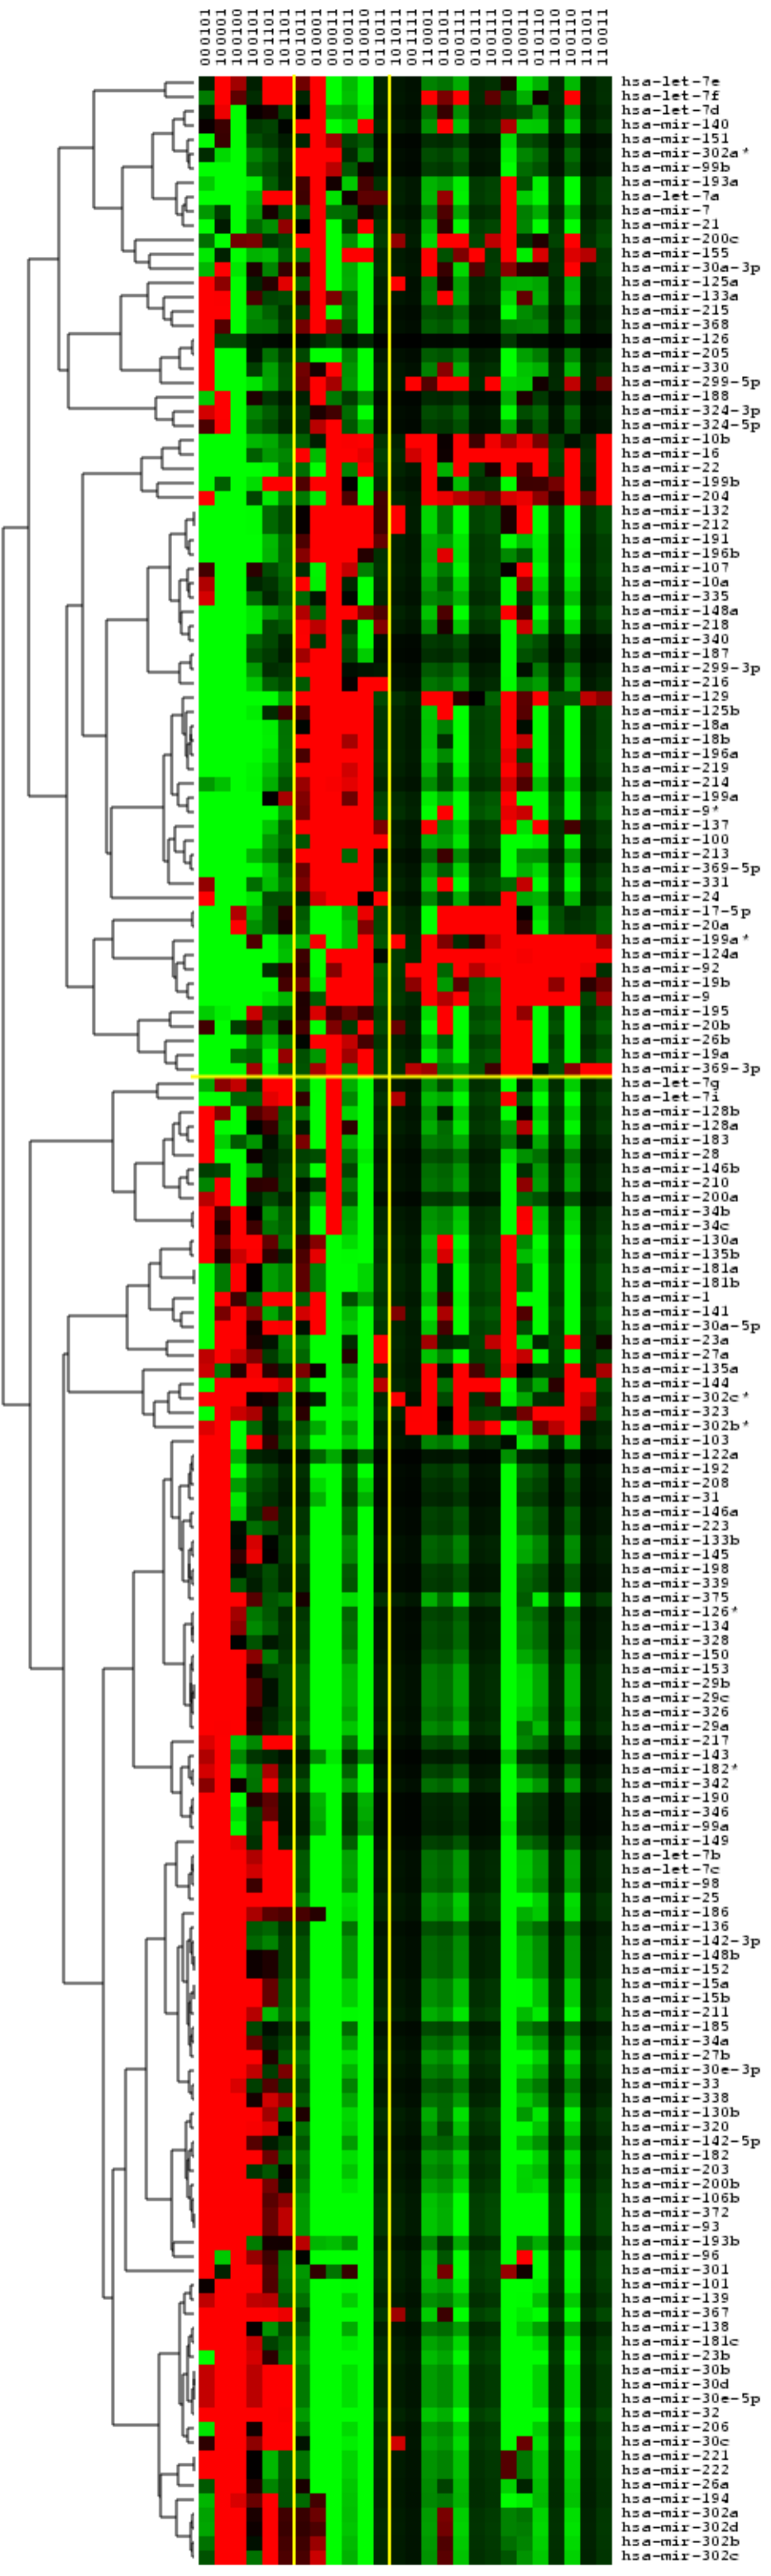

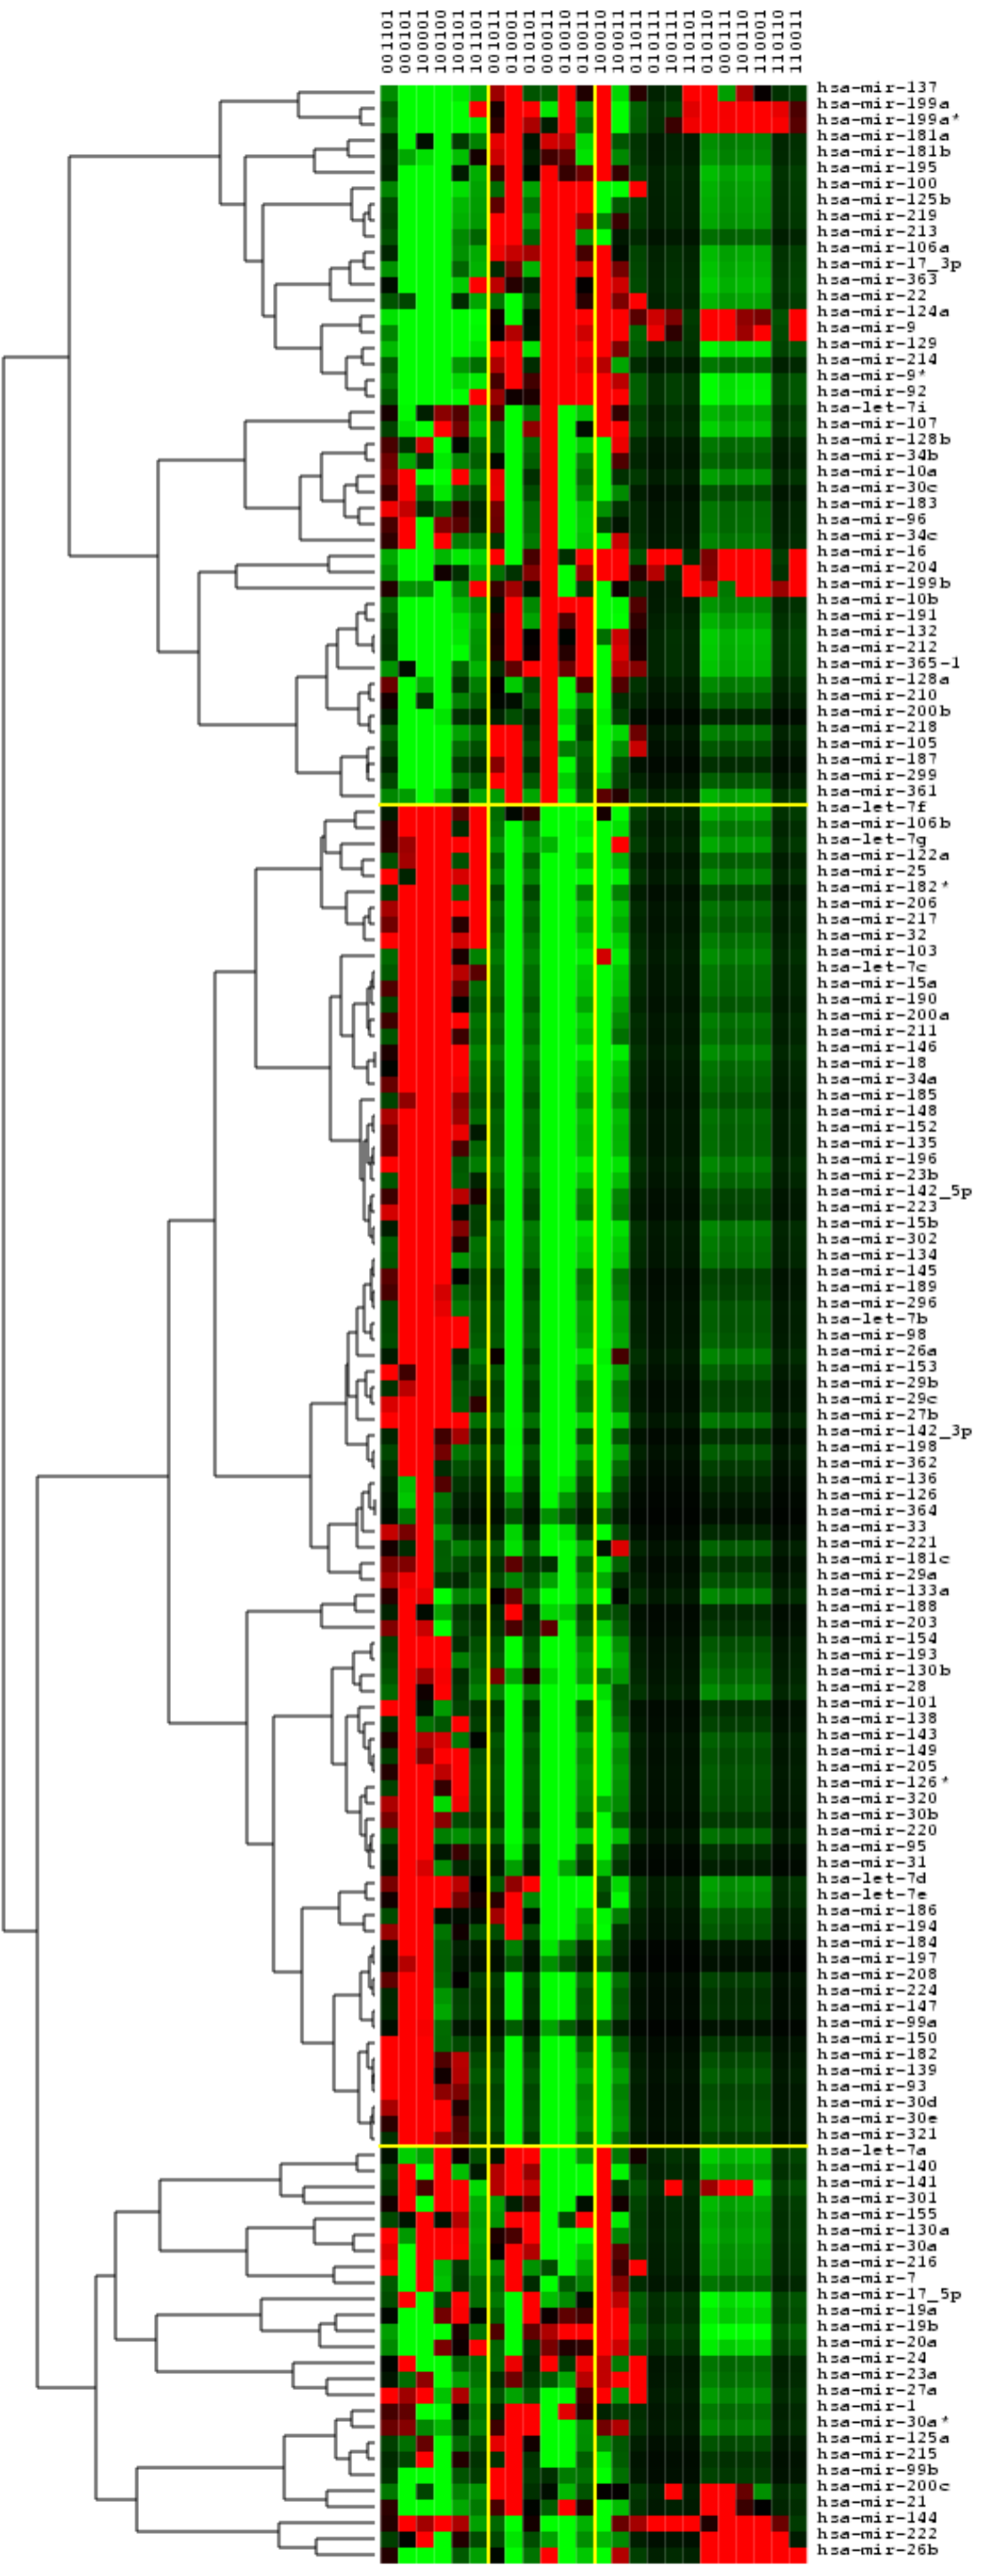



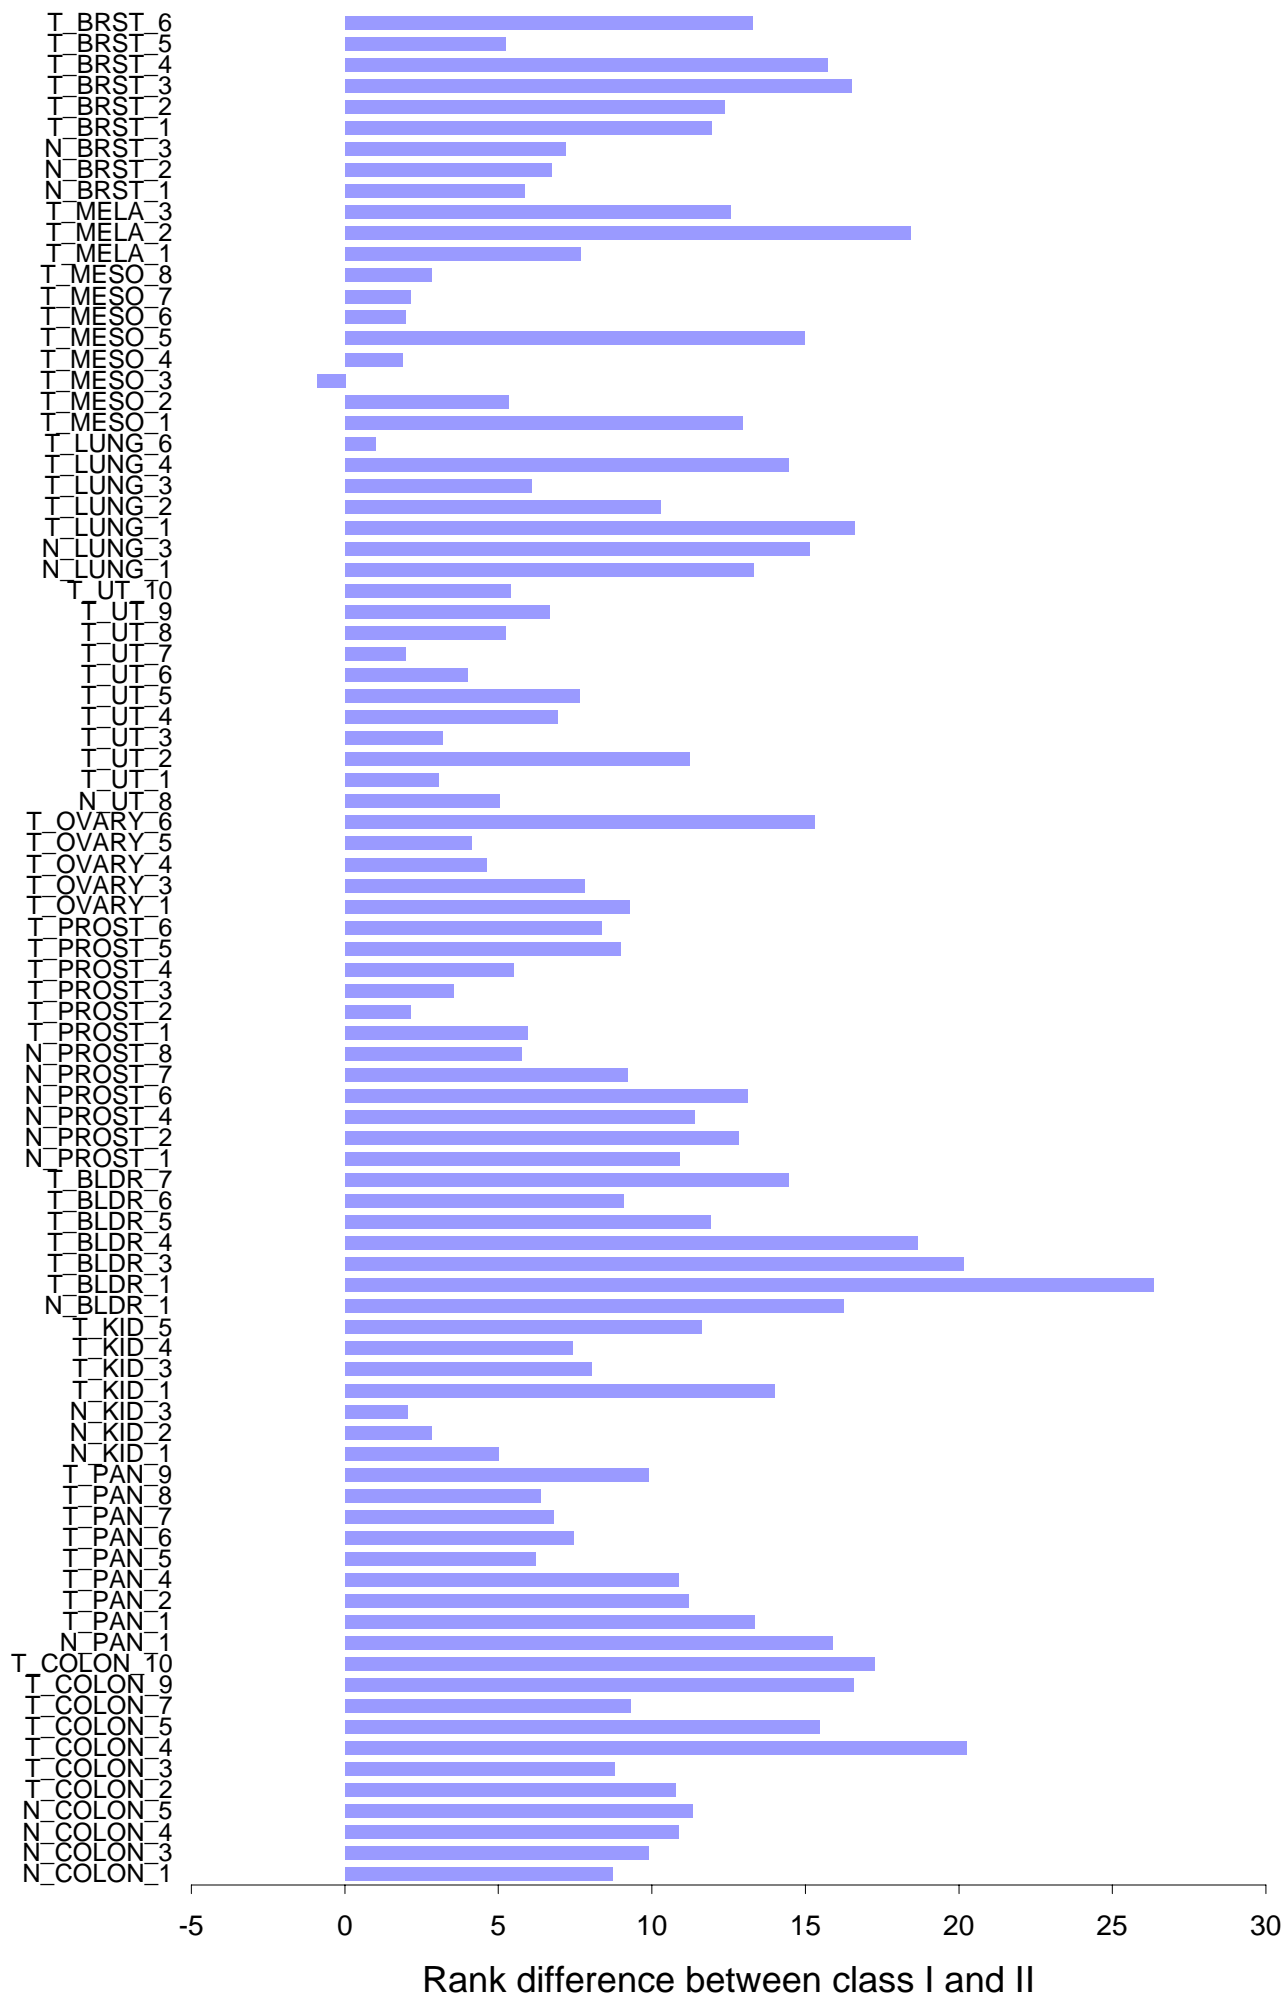

Supplement: gkn712_1.pdf [file gkn712_1.pdf]
